# Supplementary material for: First thermal studies on visible-light-switchable negative T-type photochromes of a nitrile-rich series
Source: Royal Society of Chemistry journal article supplement (doi:10.1039/d1ra02979g), 2021-01-01
Supplement: d1ra02979g1.pdf [file d1ra02979g1.pdf]

*Electronic Supplementary Information for*

**First thermal studies on visible-light-switchable negative T-type photochromes of nitrile-rich series**

Mikhail Yu. Belikov\* and Mikhail Yu. Ievlev

Ulyanov Chuvash State University, Moskovskiy pr. 15, Cheboksary, Russia.

\*E-mail: [belikovmil@mail.ru](mailto:belikovmil@mail.ru)

**Contents**

|                                                                               |     |
|-------------------------------------------------------------------------------|-----|
| 1. Kinetics of the dark reaction at different temperatures .....              | S-2 |
| 2. Relationship between the dark reaction rate constant and temperature ..... | S-3 |
| 3. NMR <sup>1</sup> H, <sup>13</sup> C spectra .....                          | S-4 |
| 4. DFT calculations .....                                                     | S-6 |

# 1. Kinetics of the dark reaction for compounds 1a and 1b at different temperatures (C = 2.5 × 10<sup>-5</sup> M)

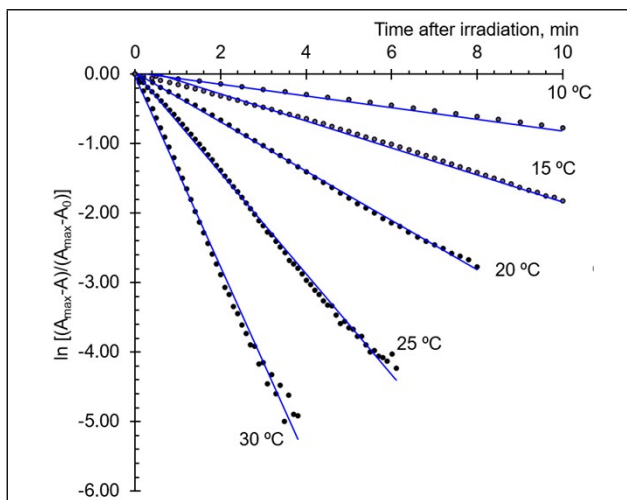

**Fig. 1.** Kinetics of the dark reaction for compound **1a** in EtOH at different temperatures

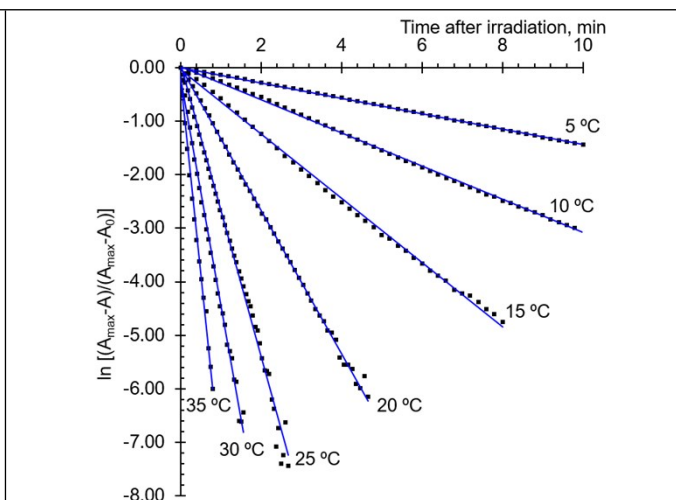

**Fig. 2.** Kinetics of the dark reaction for compound **1b** in EtOH at different temperatures

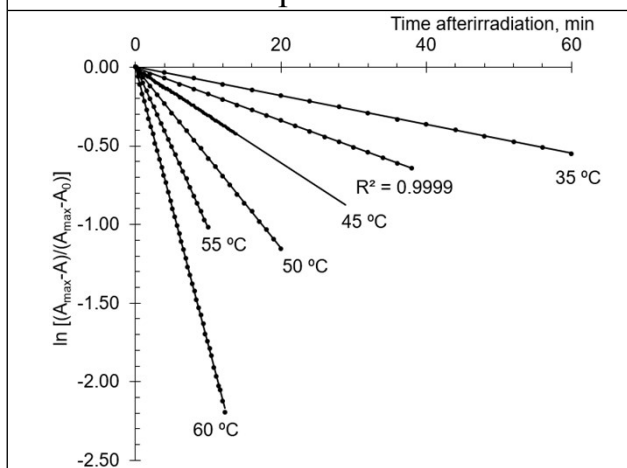

**Fig. 3.** Kinetics of the dark reaction for compound **1a** in DiOX at different temperatures

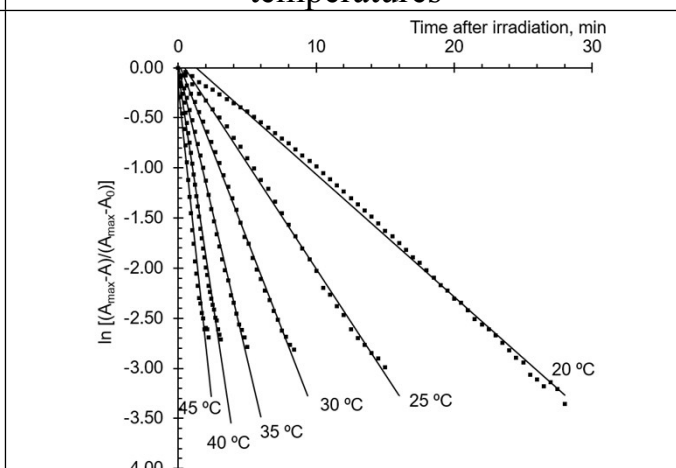

**Fig. 4.** Kinetics of the dark reaction for compound **1b** in DiOX at different temperatures

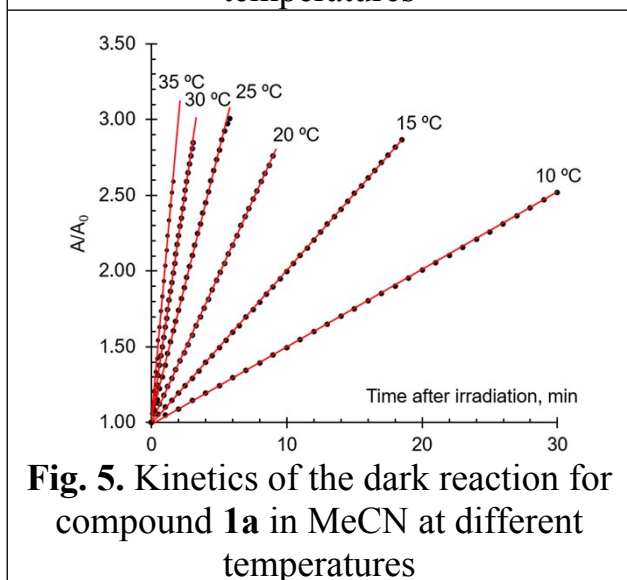

**Fig. 5.** Kinetics of the dark reaction for compound **1a** in MeCN at different temperatures

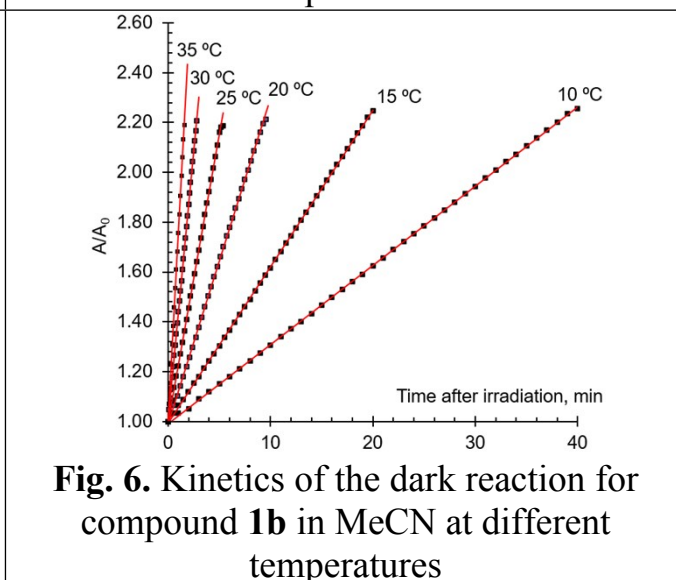

**Fig. 6.** Kinetics of the dark reaction for compound **1b** in MeCN at different temperatures

## 2. Relationship between the dark reaction rate constant and temperature for compounds 1a and 1b ( $C = 2.5 \times 10^{-5} \text{ M}$ )

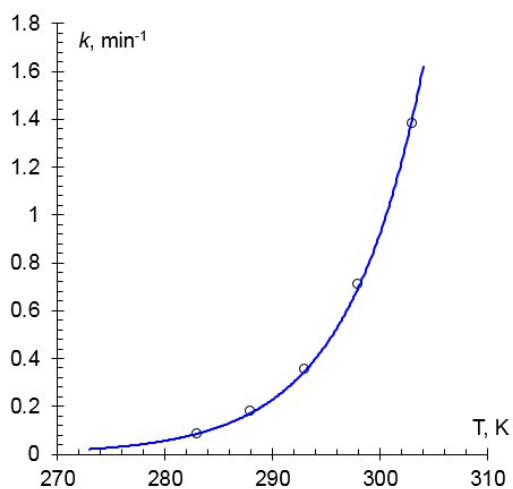

**Fig. 7.** Relationship between the dark reaction rate constant and temperature for compounds **1a** in EtOH

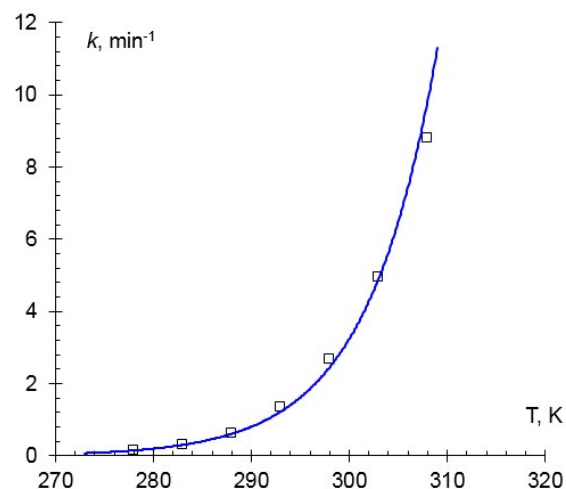

**Fig. 8.** Relationship between the dark reaction rate constant and temperature for compounds **1b** in EtOH

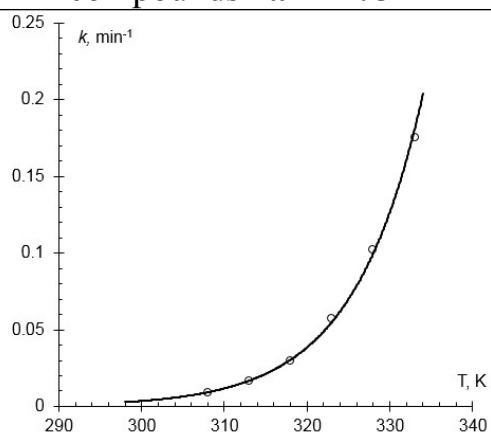

**Fig. 9.** Relationship between the dark reaction rate constant and temperature for compounds **1a** in DiOX

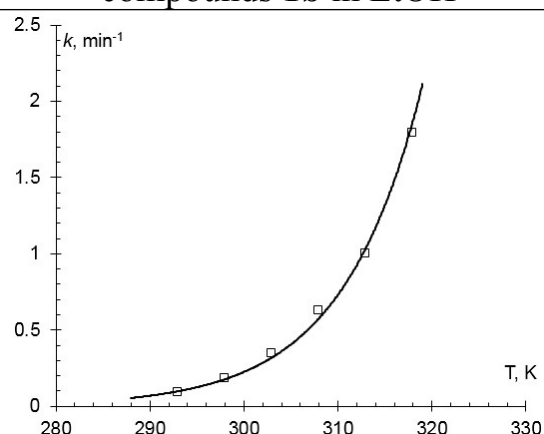

**Fig. 10.** Relationship between the dark reaction rate constant and temperature for compounds **1b** in DiOX

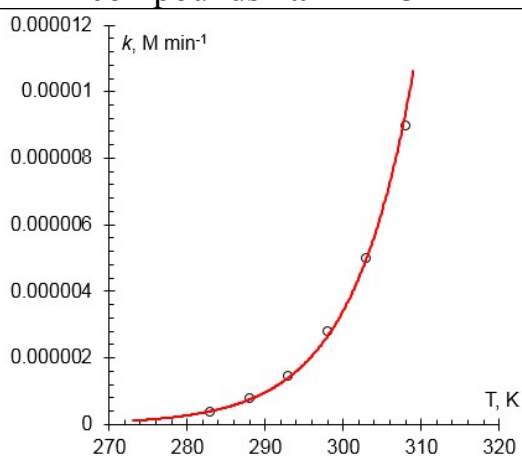

**Fig. 11.** Relationship between the dark reaction rate constant and temperature for compounds **1a** in MeCN

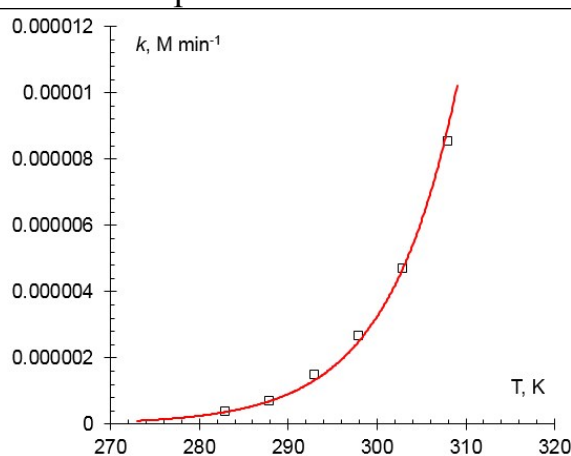

**Fig. 12.** Relationship between the dark reaction rate constant and temperature for compounds **1b** in MeCN

### 3. NMR $^1\text{H}$ , $^{13}\text{C}$ spectra

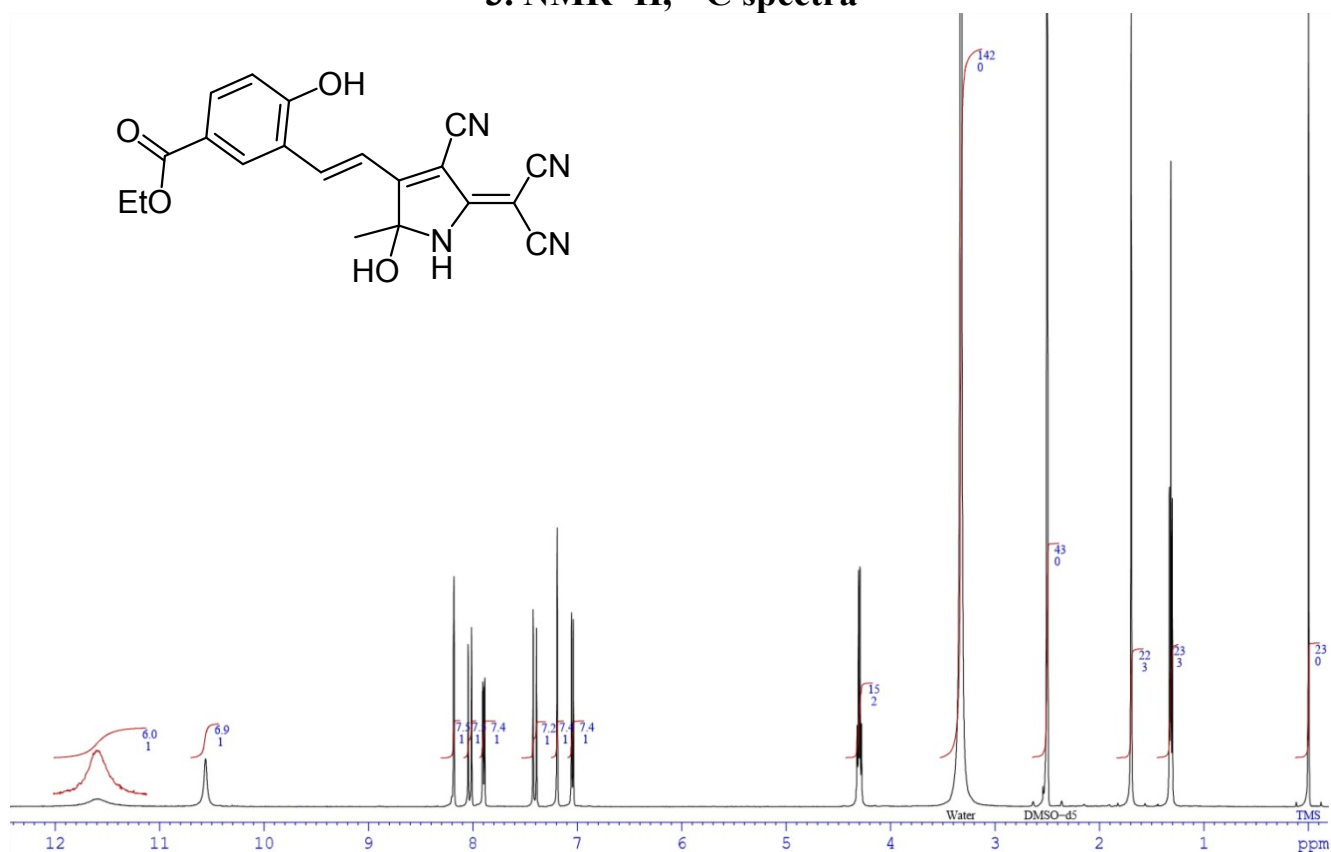

**Fig. 13.**  $^1\text{H}$ -NMR-spectrum of compound **1a** (500 MHz,  $\text{DMSO-}d_6$ , 298K)

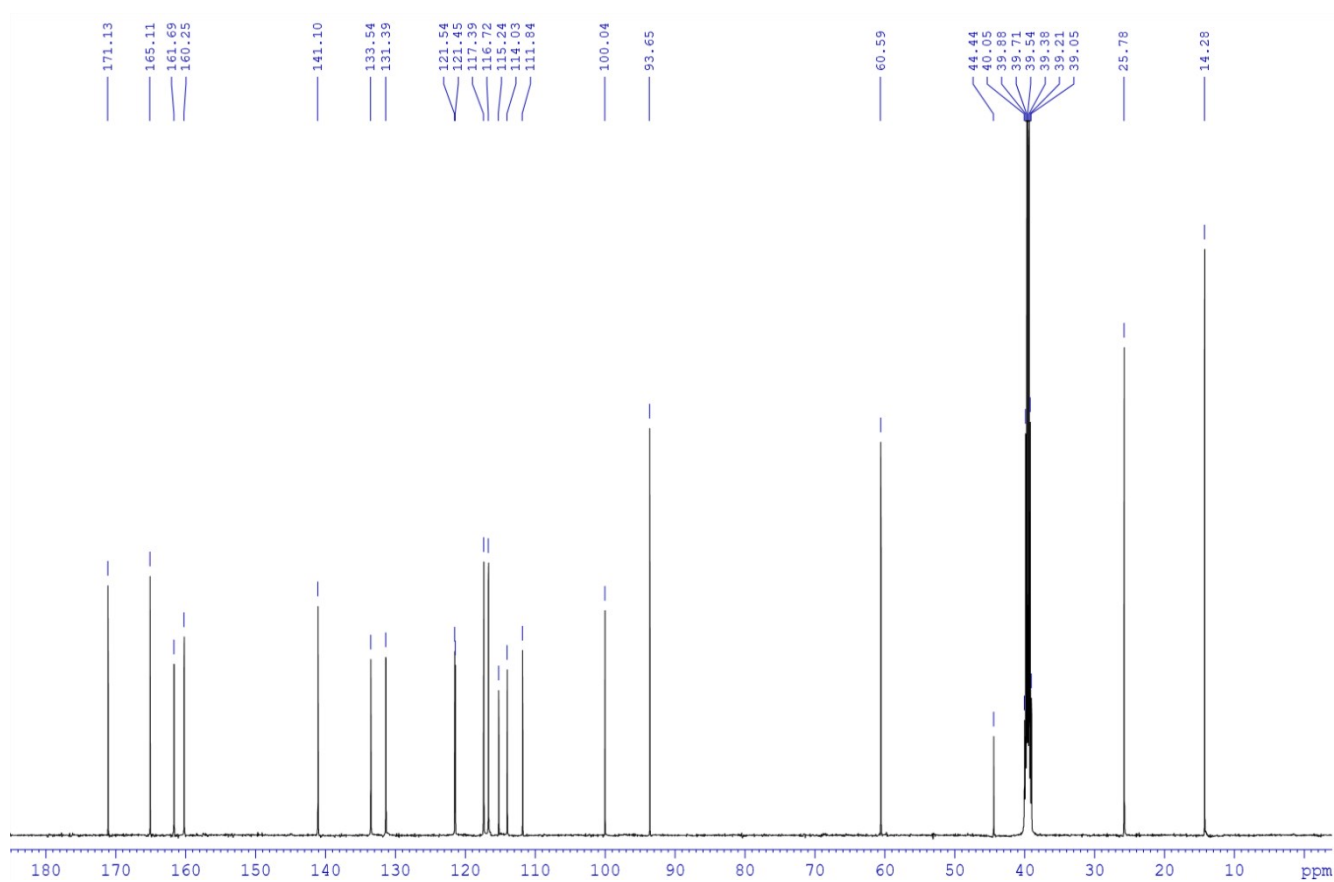

**Fig. 14.**  $^{13}\text{C}$ -NMR-spectrum of compound **1a** (126 MHz,  $\text{DMSO-}d_6$ , 299K)

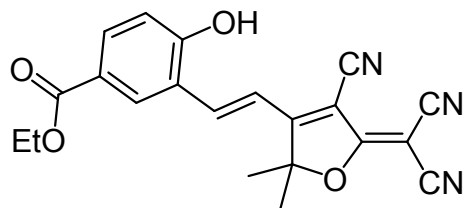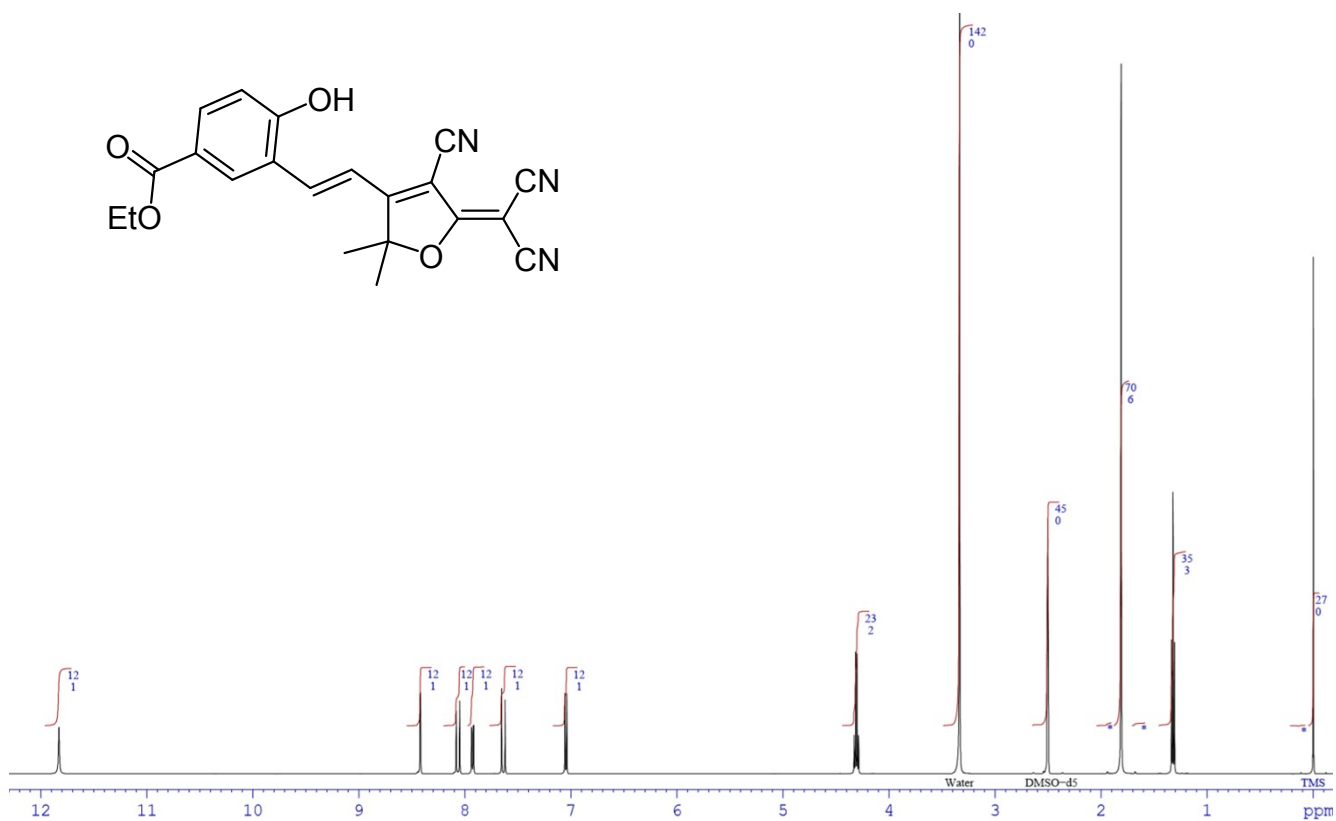

**Fig. 15.**  $^1\text{H}$ -NMR-spectrum of compound **1b** (500 MHz,  $\text{DMSO}-d_6$ , 298K)

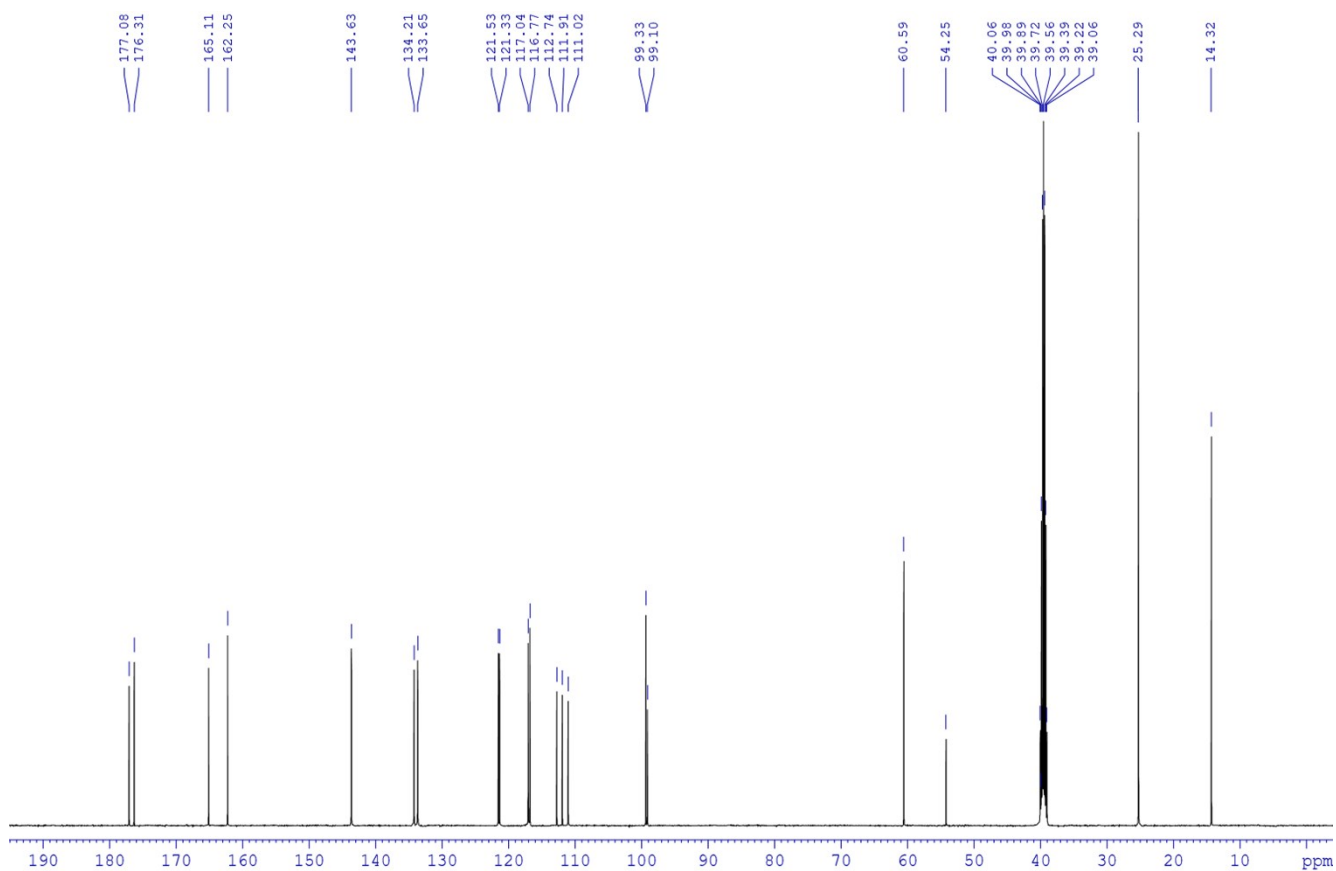

**Fig. 16.**  $^{13}\text{C}$ -NMR-spectrum of compound **1b** (126 MHz,  $\text{DMSO}-d_6$ , 298K)

#### 4. DFT calculations

Geometry optimization of the compounds was performed using Becke-3-Lee-Yang-Parr (B3LYP) functional with 6-311++G(d,p) basis set in gas phase. The frontier molecular orbitals were visualized using Avogadro software.

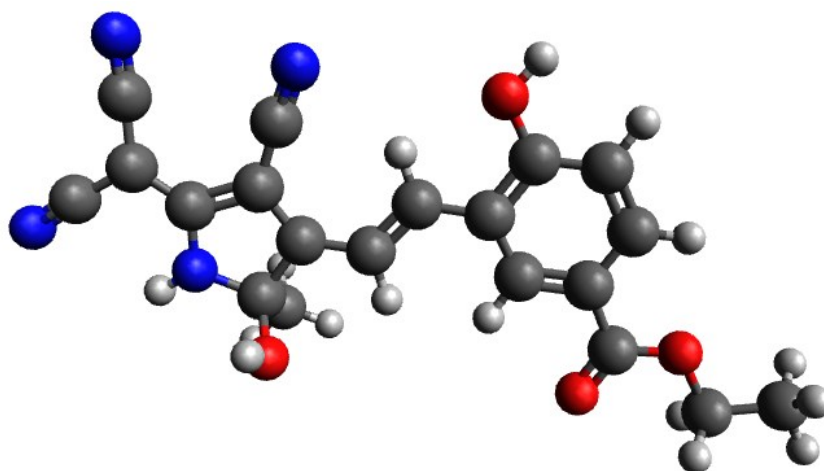

**Fig. 17.** Optimized geometry of compound **1a**

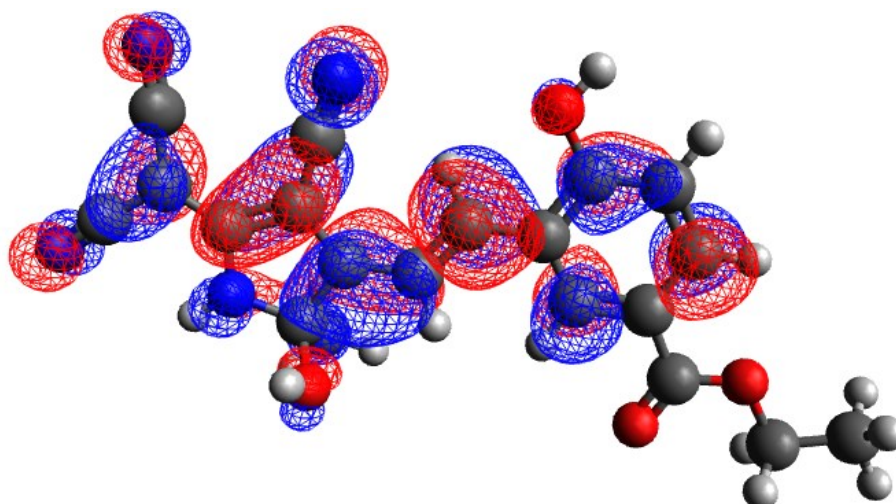

**Fig. 18.** Visualization of LUMO of compound **1a**

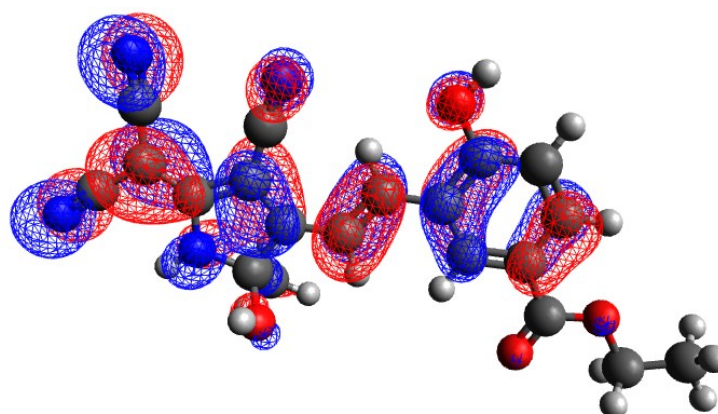

**Fig. 19.** Visualization of HOMO of compound **1a**

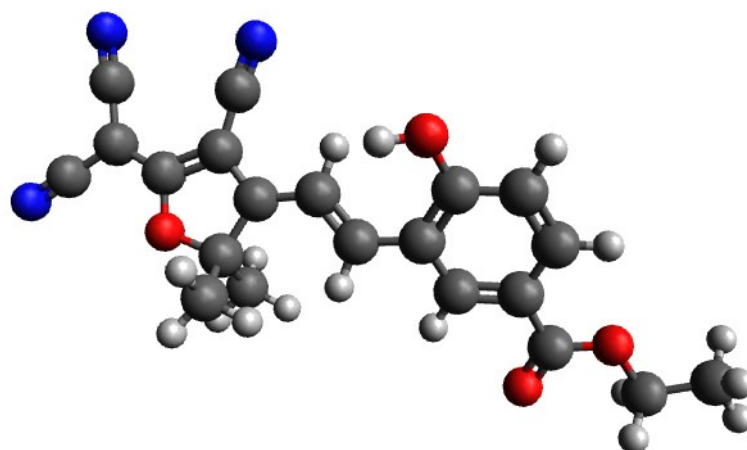

**Fig. 20.** Optimized geometry of compound **1b**

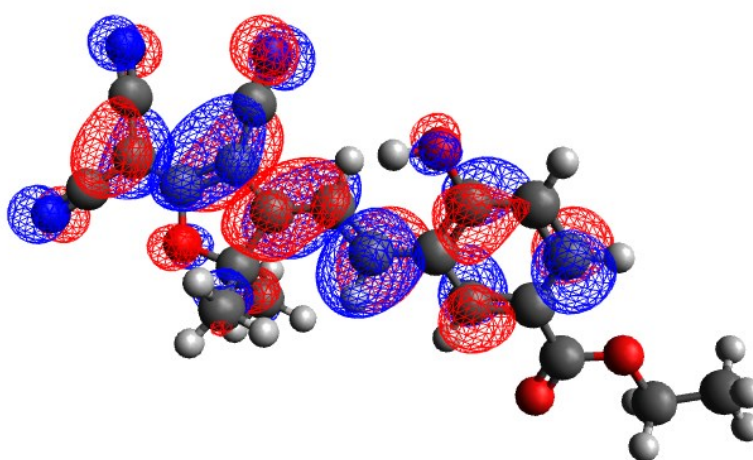

**Fig. 21.** Visualization of LUMO of compound **1b**

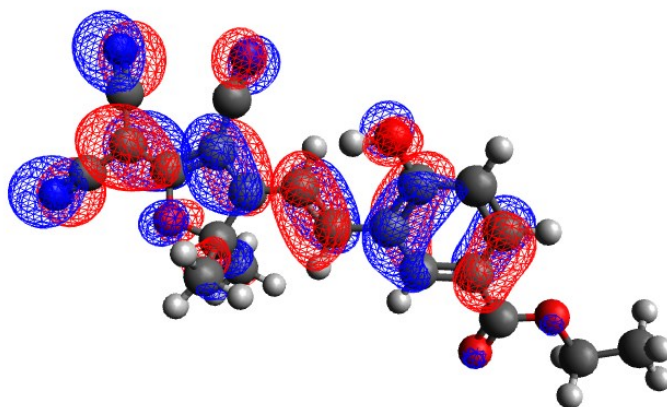

**Fig. 22.** Visualization of HOMO of compound **1b**
